# Supplementary material
Source: PubMed Central journal article supplement (PMC6282212)

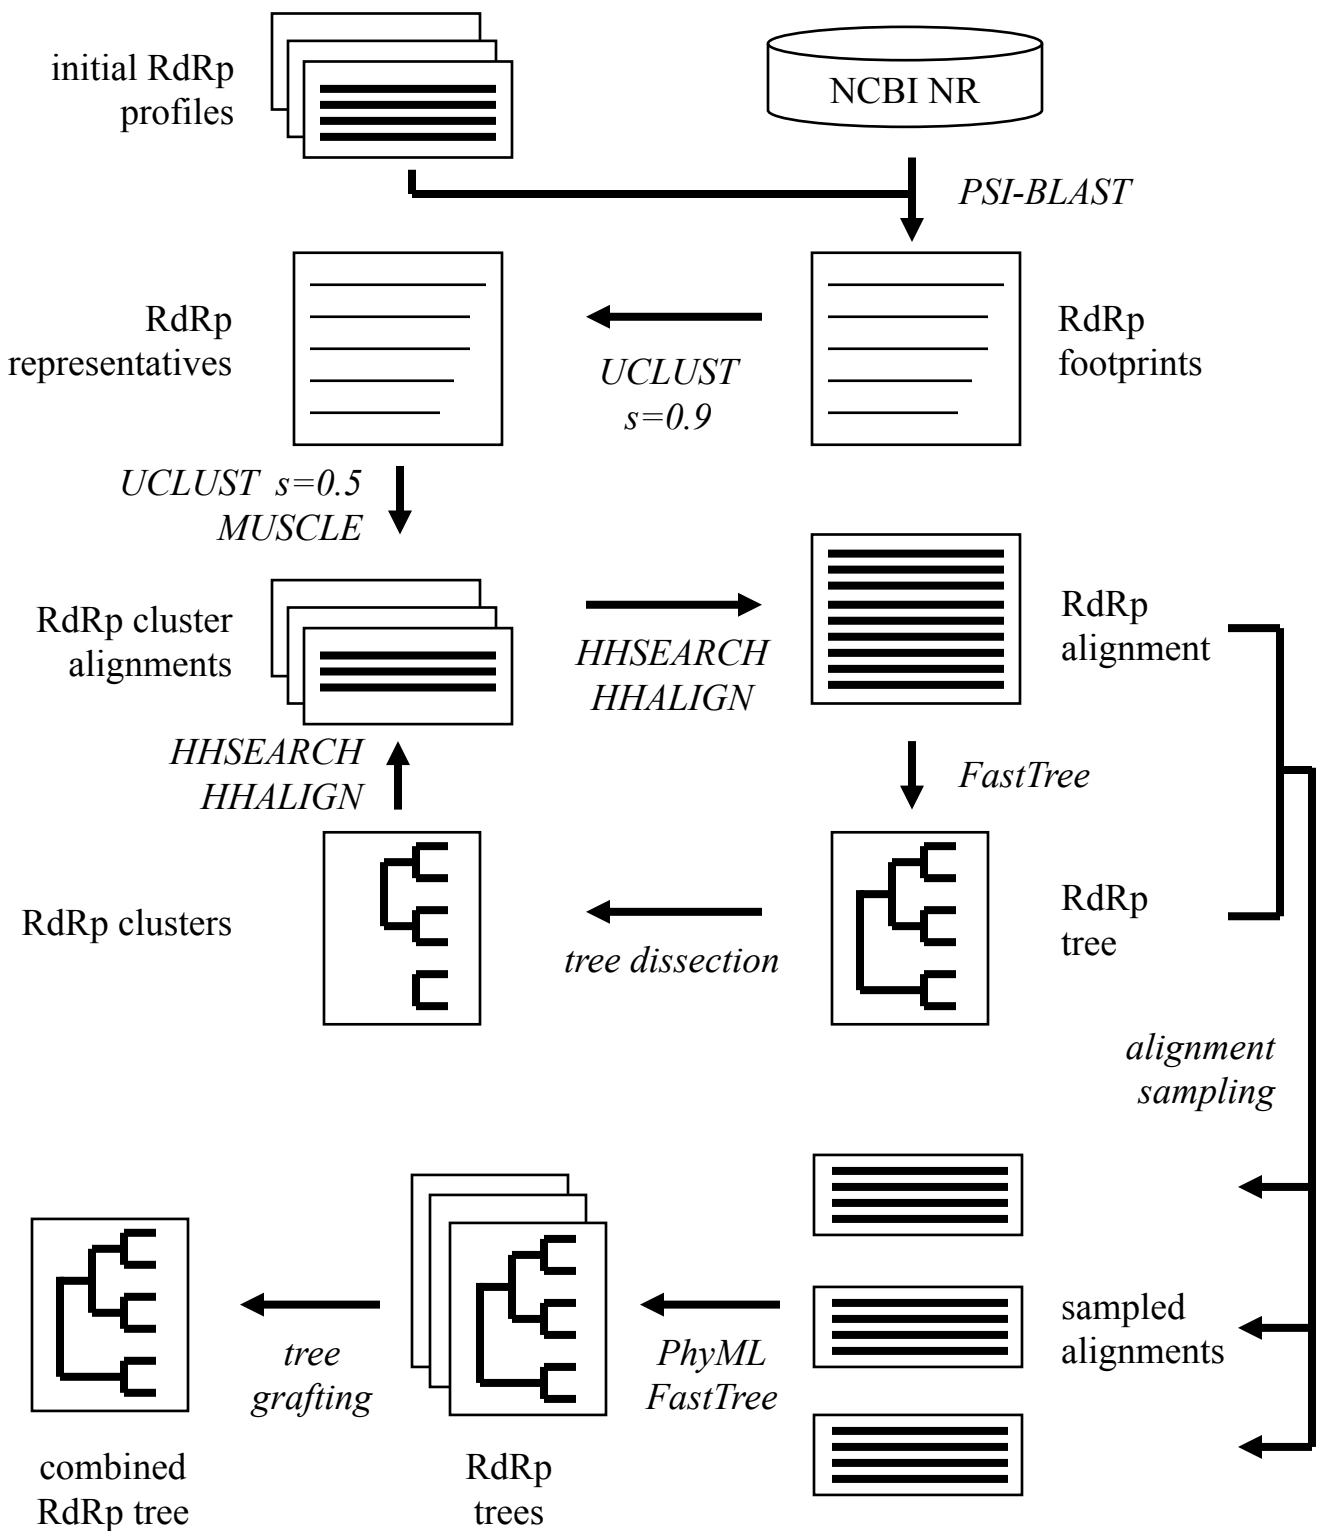

**Figure S1**

Supplement: mbo006184203sf1.pdf [file mbo006184203sf1.pdf]

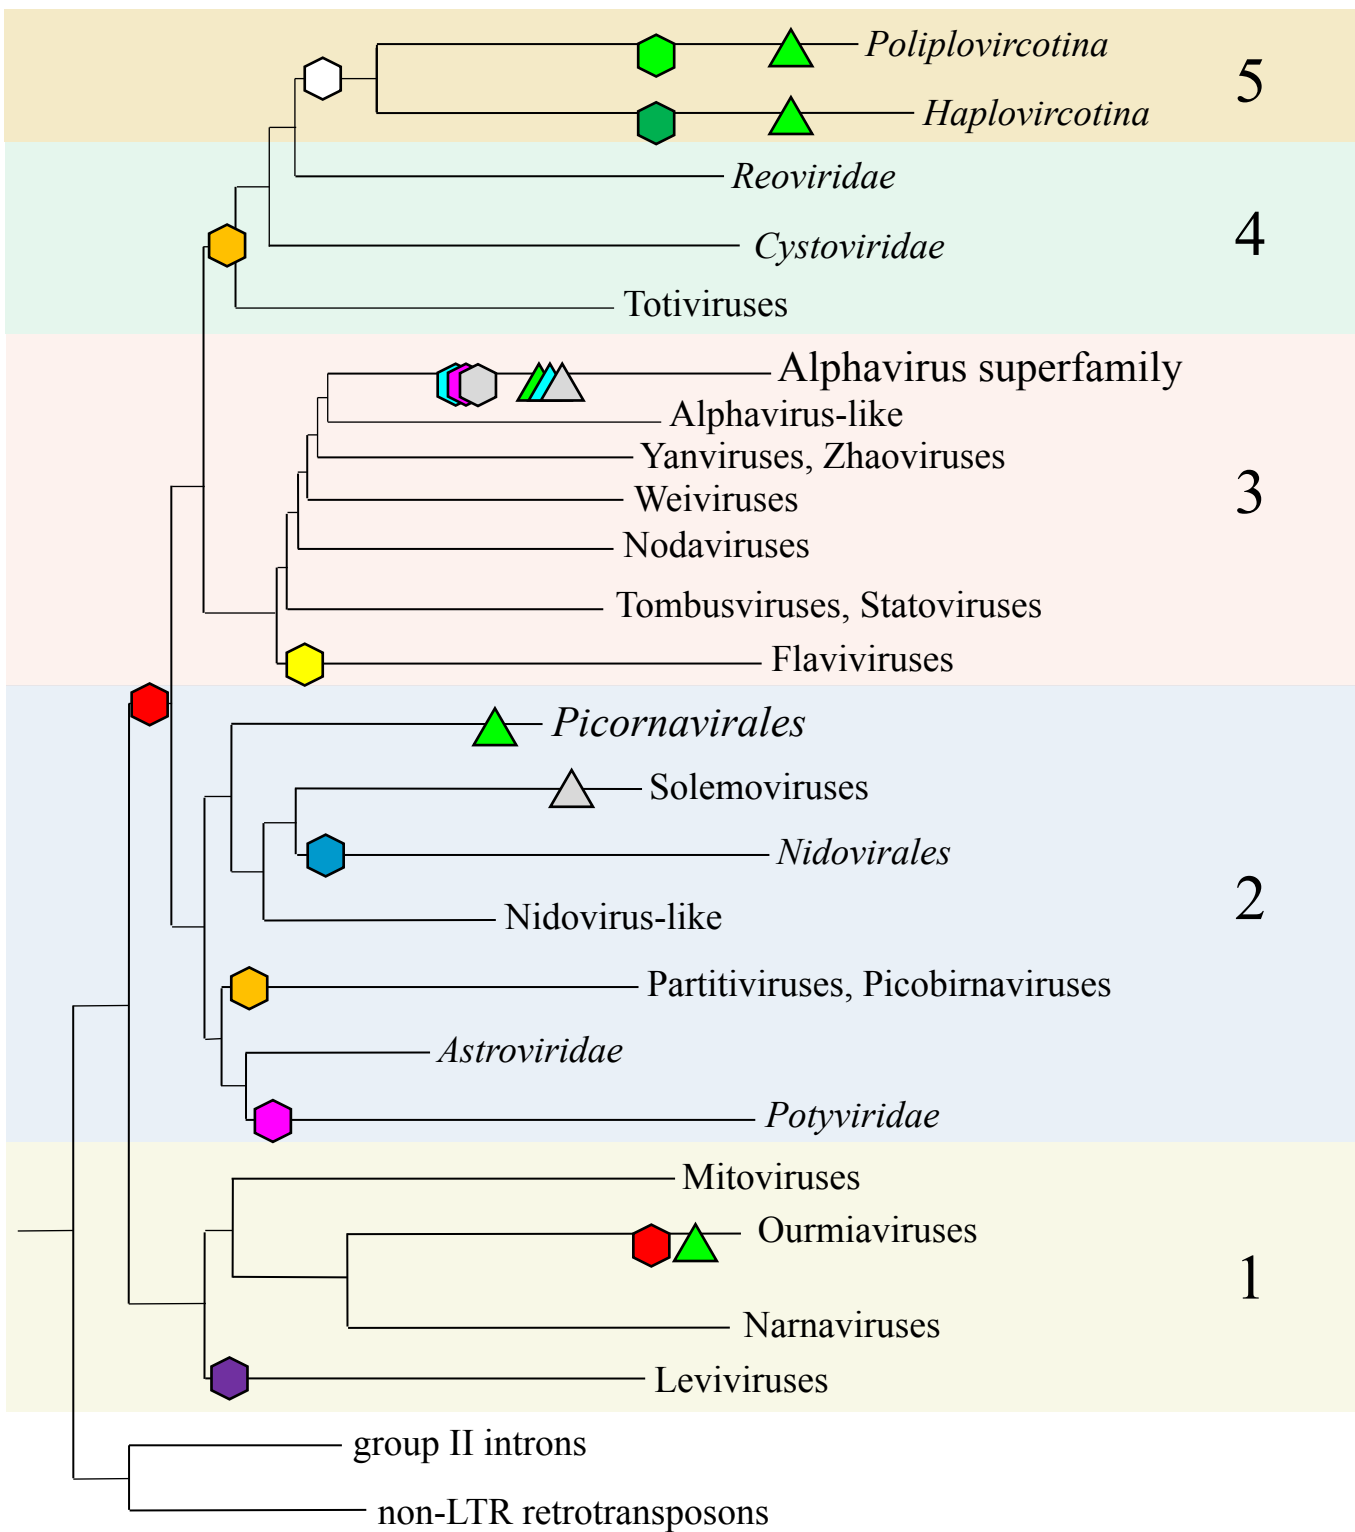

0.50

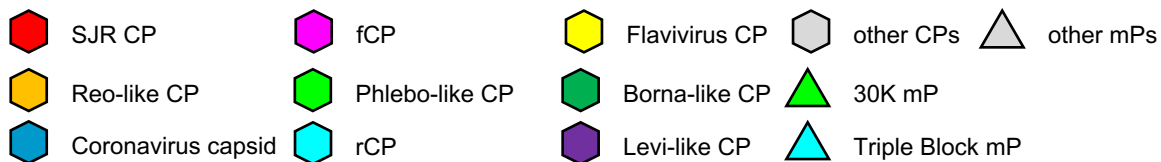

**Figure S2A**

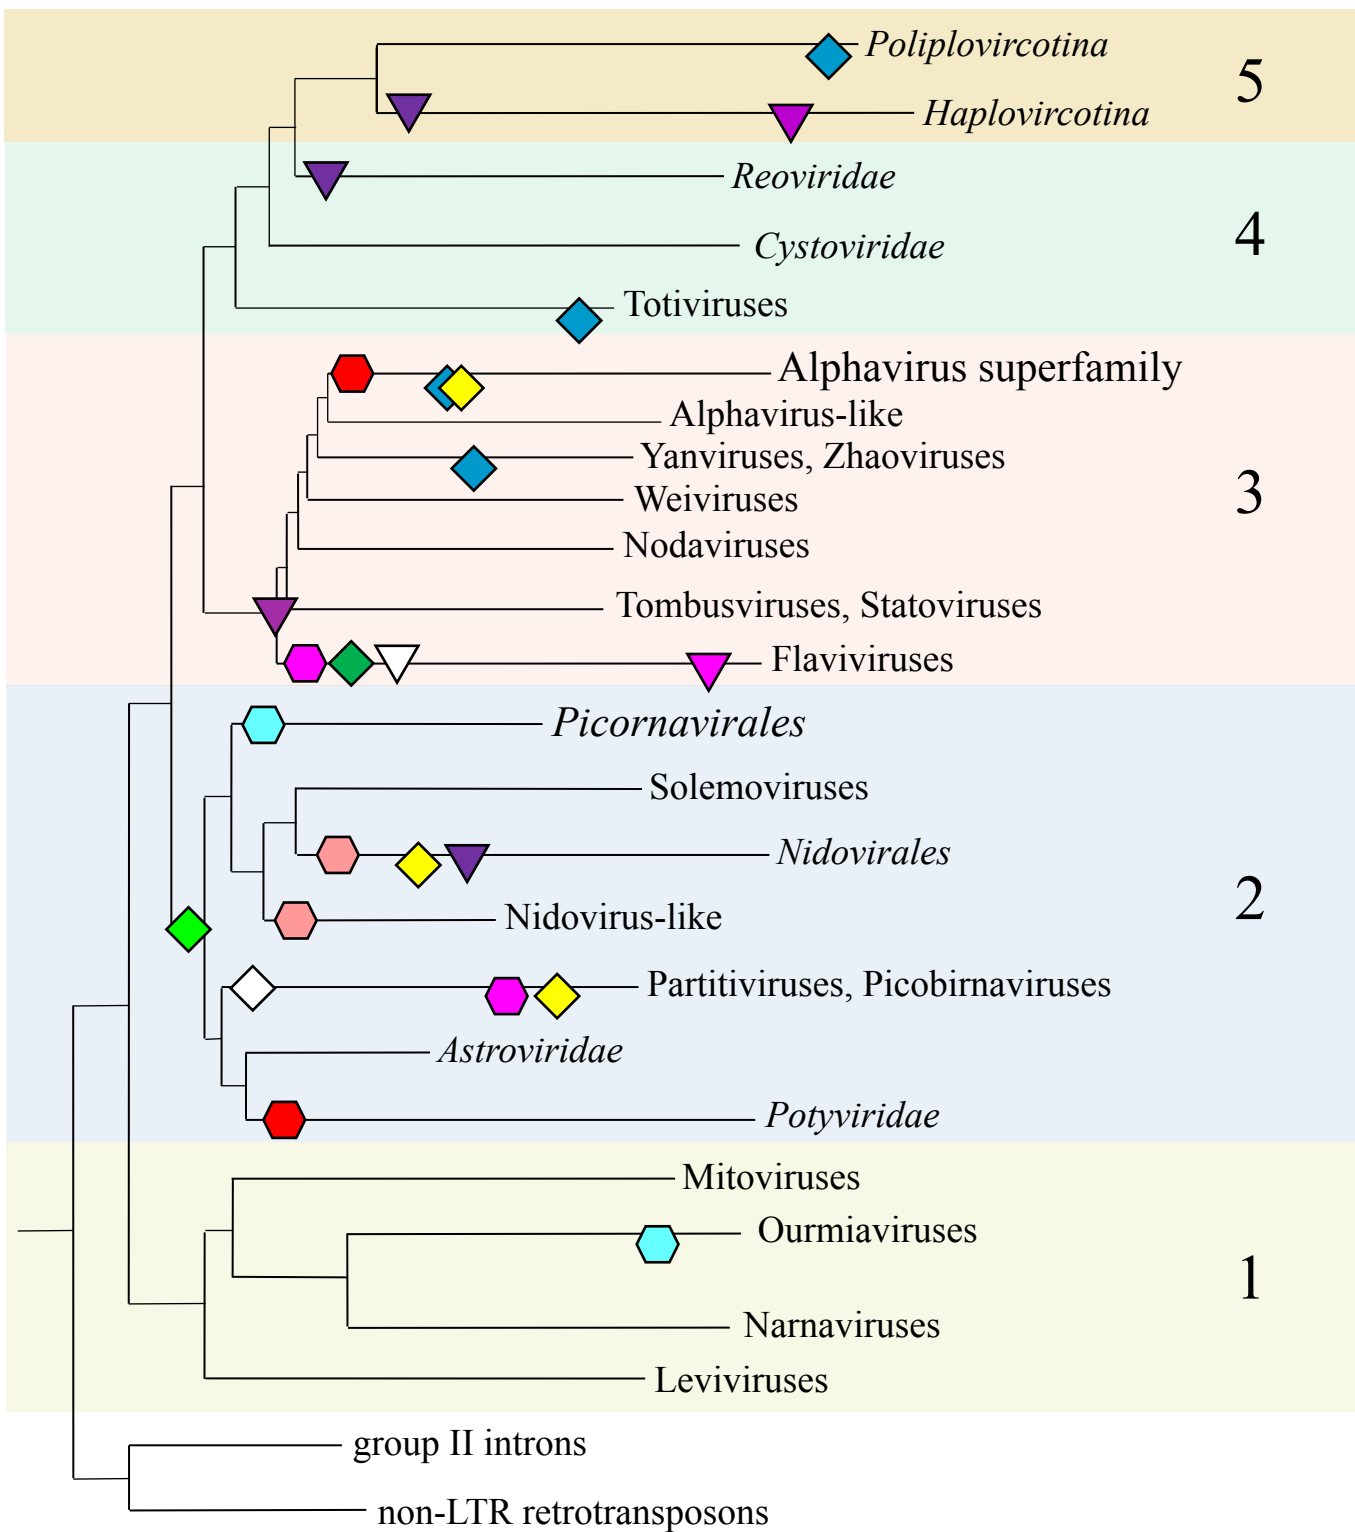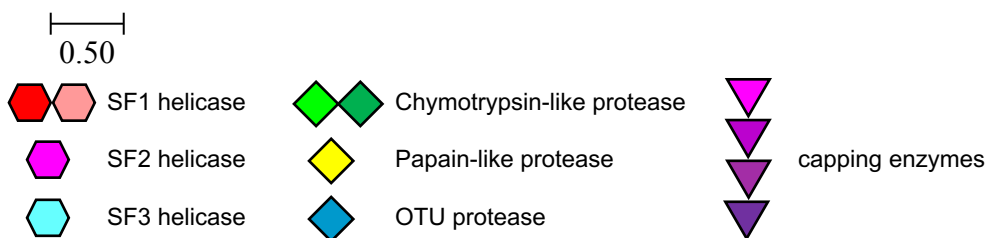

**Figure S2B**

Supplement: mbo006184203sf2.pdf [file mbo006184203sf2.pdf]

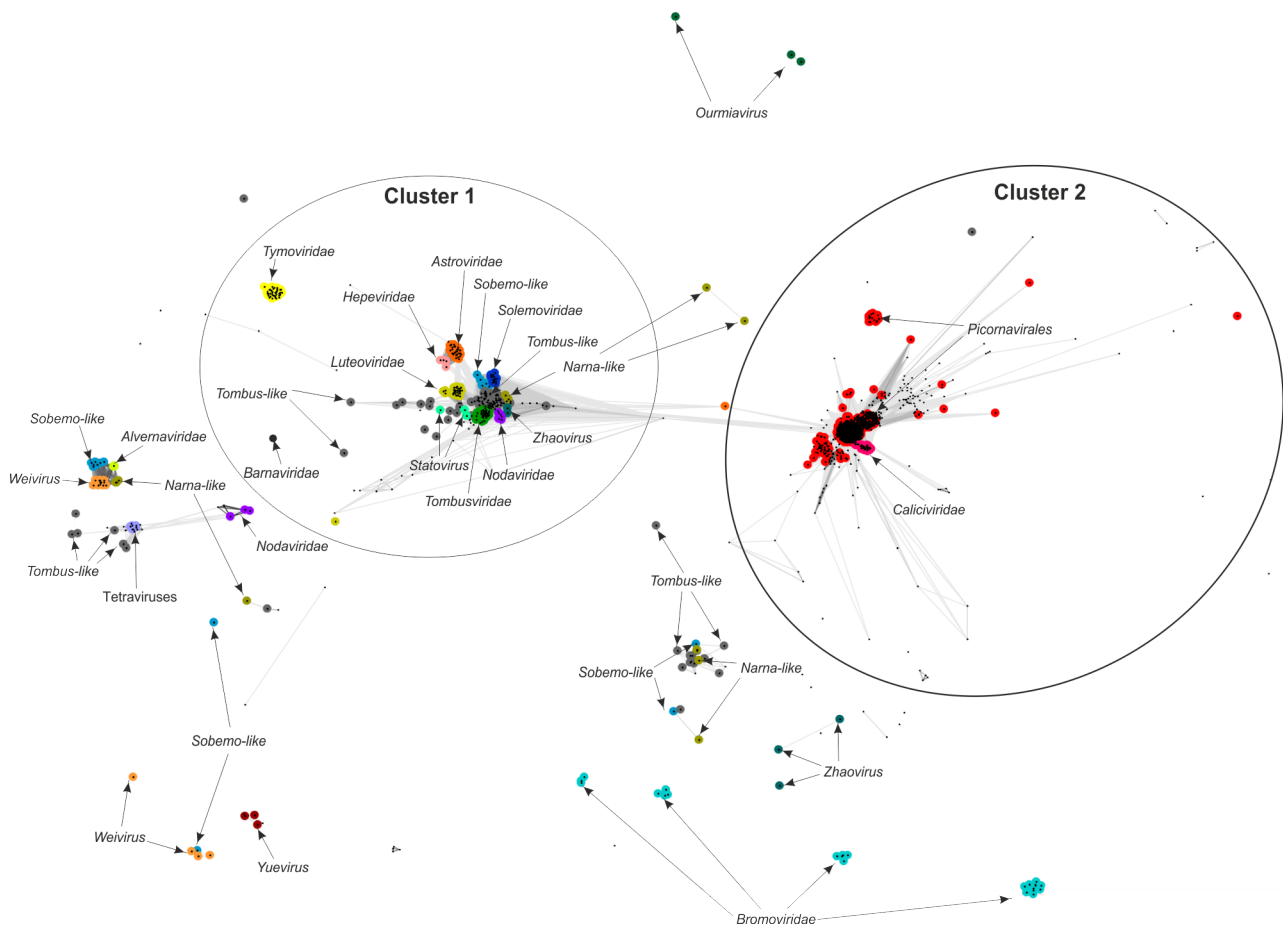

Supplement: mbo006184203sf3.pdf [file mbo006184203sf3.pdf]
